# Supplementary material for: Optical Redox Imaging of Ex Vivo Hippocampal Tissue Reveals Age-Dependent Alterations in the 5XFAD Mouse Model of Alzheimer’s Disease
Source: MDPI journal article supplement (doi:10.3390/metabo12090786), 2022-08-25
Supplement: s1 [file s1]

# Optical Redox Imaging of Ex Vivo Hippocampal Tissue Reveals Age-Dependent Alterations in the 5XFAD Mouse Model of Alzheimer's Disease

**Table S1.** Experimental data (WT). NA: not measured.

| Age (month) | Age Group (month) | Genotype | Sex | AB <sub>42</sub> (pg/mL) | NADH (a.u.) | Fp (a.u.) | Fp/(NADH+Fp) |
|-------------|-------------------|----------|-----|--------------------------|-------------|-----------|--------------|
| 1.2         | 2                 | WT       | F   | NA                       | 1648        | 493       | 0.231        |
| 1.25        | 2                 | WT       | F   | NA                       | 1485        | 231       | 0.134        |
| 2.5         | 2                 | WT       | F   | NA                       | 1313        | 238       | 0.153        |
| 2.5         | 2                 | WT       | F   | NA                       | 1538        | 263       | 0.146        |
| 2.5         | 2                 | WT       | F   | NA                       | 1238        | 283       | 0.186        |
| 3.5         | 3.5               | WT       | M   | NA                       | 1143        | 246       | 0.177        |
| 3.5         | 3.5               | WT       | F   | NA                       | 1104        | 318       | 0.224        |
| 3.5         | 3.5               | WT       | M   | NA                       | 1927        | 309       | 0.139        |
| 3.5         | 3.5               | WT       | F   | NA                       | 1594        | 222       | 0.123        |
| 3.5         | 3.5               | WT       | F   | NA                       | 1628        | 226       | 0.122        |
| 6.5         | 7.5               | WT       | F   | NA                       | 1208        | 276       | 0.199        |
| 6.5         | 7.5               | WT       | F   | NA                       | 1231        | 330       | 0.219        |
| 6.5         | 7.5               | WT       | F   | NA                       | 1511        | 390       | 0.215        |
| 8           | 7.5               | WT       | F   | NA                       | 1615        | 463       | 0.232        |
| 7.3         | 7.5               | WT       | M   | NA                       | 1373        | 529       | 0.294        |
| 7.3         | 7.5               | WT       | M   | NA                       | 1825        | 459       | 0.221        |
| 7.5         | 7.5               | WT       | M   | NA                       | 1338        | 435       | 0.245        |
| 7.5         | 7.5               | WT       | M   | NA                       | 1138        | 334       | 0.227        |
| 14          | 14                | WT       | M   | NA                       | 1901        | 649       | 0.255        |
| 14          | 14                | WT       | F   | NA                       | 1561        | 604       | 0.279        |
| 14          | 14                | WT       | F   | NA                       | 1579        | 547       | 0.257        |

**Table S2.** Experimental data (5XFAD). NA: not measured.

| Age (month) | Age Group (month) | Genotype | Sex | AB <sub>42</sub> (pg/mL) | NADH (a.u.) | Fp (a.u.) | Fp/(NADH+Fp) |
|-------------|-------------------|----------|-----|--------------------------|-------------|-----------|--------------|
| 1.2         | 2                 | 5XFAD    | F   | 68                       | 2065        | 422       | 0.176        |
| 1.25        | 2                 | 5XFAD    | F   | 162                      | 1732        | 286       | 0.142        |
| 1.9         | 2                 | 5XFAD    | M   | 129                      | 1718        | 273       | 0.137        |
| 1.9         | 2                 | 5XFAD    | M   | 141                      | 1637        | 221       | 0.119        |
| 1.9         | 2                 | 5XFAD    | F   | 300                      | 1671        | 248       | 0.129        |
| 1.9         | 2                 | 5XFAD    | F   | 219                      | 1682        | 209       | 0.110        |
| 3.5         | 3.5               | 5XFAD    | M   | NA                       | 1986        | 266       | 0.118        |
| 3.5         | 3.5               | 5XFAD    | F   | 638                      | 1865        | 318       | 0.146        |
| 3.5         | 3.5               | 5XFAD    | F   | 478                      | 2031        | 327       | 0.139        |
| 3.5         | 3.5               | 5XFAD    | M   | 295                      | 1443        | 214       | 0.129        |
| 3.5         | 3.5               | 5XFAD    | F   | 557                      | 1320        | 288       | 0.179        |
| 8           | 7.5               | 5XFAD    | M   | 927                      | 1524        | 572       | 0.289        |
| 8           | 7.5               | 5XFAD    | F   | 1165                     | 1552        | 613       | 0.288        |
| 7.3         | 7.5               | 5XFAD    | F   | 1107                     | 1694        | 648       | 0.284        |
| 7.3         | 7.5               | 5XFAD    | F   | 1214                     | 1684        | 661       | 0.287        |

---

|     |     |       |   |      |      |     |       |
|-----|-----|-------|---|------|------|-----|-------|
| 7.5 | 7.5 | 5XFAD | F | 1053 | 1288 | 508 | 0.283 |
| 6.5 | 7.5 | 5XFAD | M | 942  | 1444 | 494 | 0.269 |
| 6.5 | 7.5 | 5XFAD | M | 868  | 1308 | 523 | 0.302 |
| 6.5 | 7.5 | 5XFAD | F | 1013 | 1176 | 454 | 0.288 |
| 14  | 14  | 5XFAD | F | 1148 | 1364 | 693 | 0.337 |
| 14  | 14  | 5XFAD | F | 1082 | 1329 | 826 | 0.383 |

---
